# Supplementary material
Source: Springer Nature journal article supplement (https://www.springermedizin.de/resource/supplementary/12889_2012_4689_MOESM6_ESM.pdf/9493212)

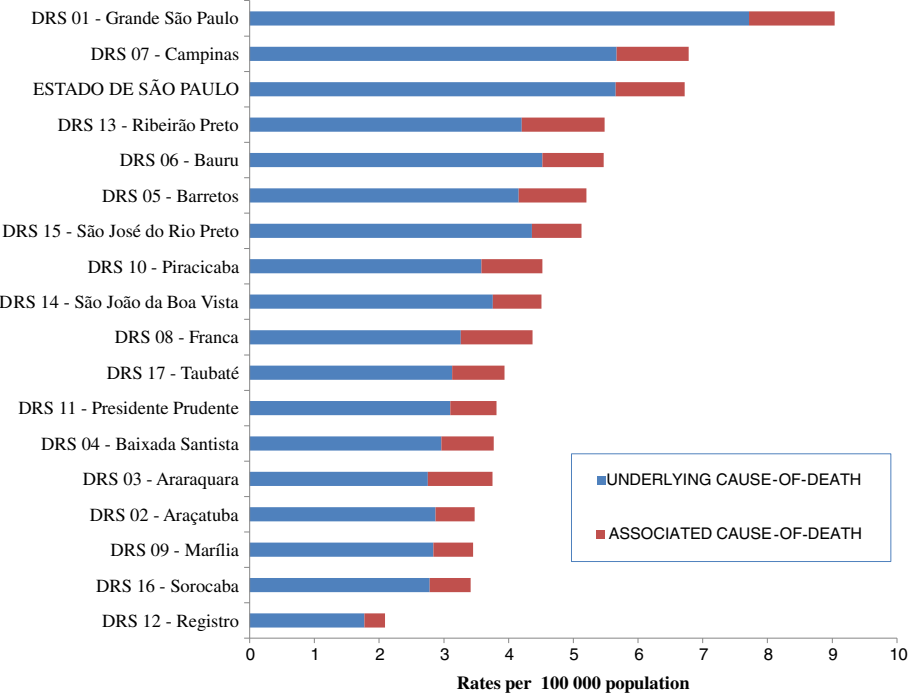

Supplement: MOESM6 [file 9493212]
